# Supplementary material
Source: Springer Nature journal article supplement (https://www.springermedizin.de/resource/supplementary/12885_2013_4802_MOESM1_ESM.pdf/9467292)
Supplement: MOESM1 [file 9467292]

HCC patients  
treated by TACE  
(**n = 902**)

Patients without enough  
clinical data  
(**n = 113**)

Patients submitted to  
previous treatments  
(**n = 445**)

Patients with multiple  
HCC nodules  
(**n = 188**)

Patients with CPT-C  
liver function  
(**n = 6**)

Patients with neoplastic  
thrombosis  
(**n = 2**)

Final study group  
(**n = 148**)
